# Supplementary material
Source: ML conference proceedings conference paper supplement (https://openreview.net/forum?id=JZfg6wGi6g)
Supplement: supplementary_material [file attachment]

429 **Appendix**

430 **A More Observation Plots**

431 **A.1 Repetitive Attention Pattern**

432 We provide the attention map similar to Figure 1 but from a different transformer layer on the same  
433 text in Figure 6, Figure 7, Figure 8 and Figure 9. A repetitive pattern and attention sparsity can be  
434 observed across layers.

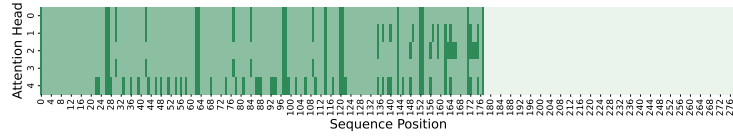

(a) Attention map at position 178

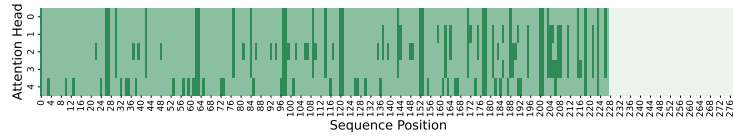

(b) Attention map at position 228

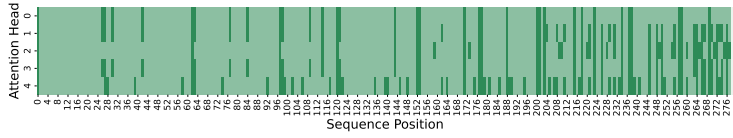

(c) Attention map at position 278

Figure 6: Attention Map at Layer 5

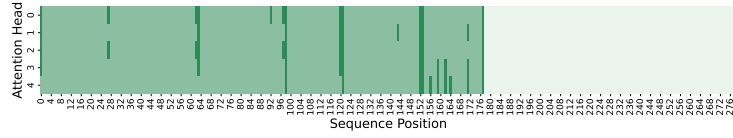

(a) Attention map at position 178

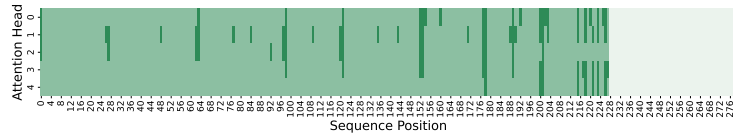

(b) Attention map at position 228

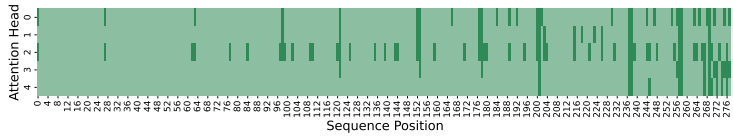

(c) Attention map at position 278

Figure 7: Attention Map at Layer 10

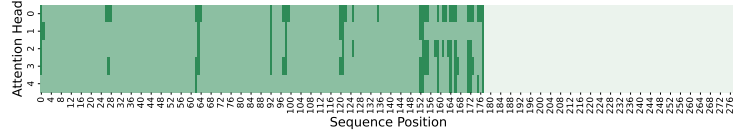

(a) Attention map at position 178

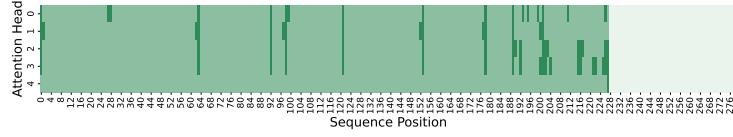

(b) Attention map at position 228

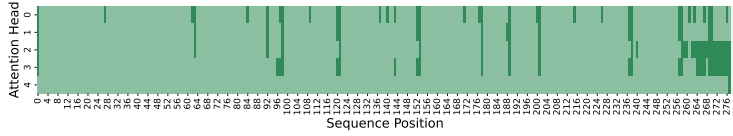

(c) Attention map at position 278

Figure 8: Attention Map at Layer 15

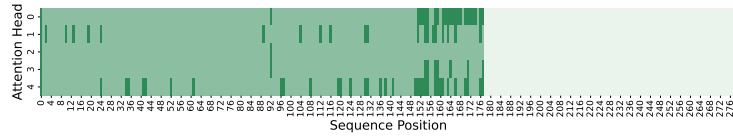

(a) Attention map at position 178

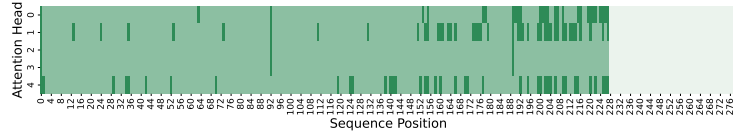

(b) Attention map at position 228

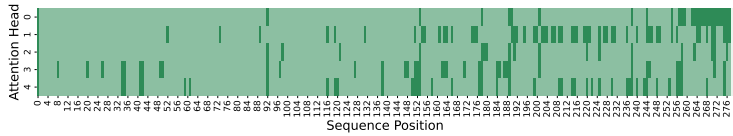

(c) Attention map at position 278

Figure 9: Attention Map at Layer 20

435 **A.2 Cross Layer Cosine Similarity**

436 In Section 3.3, our analysis assumes a large cosine similarity between the input and output of  $\mathcal{F}$ . Here,  
 437 we provide empirical evidence to support such an assumption in Figure 10. Because of the residual  
 438 connection in  $\mathcal{F}$  and the domination of  $x$ , the cosine similarity between  $x$  and  $\mathcal{F}(x)$  is extremely  
 439 high.

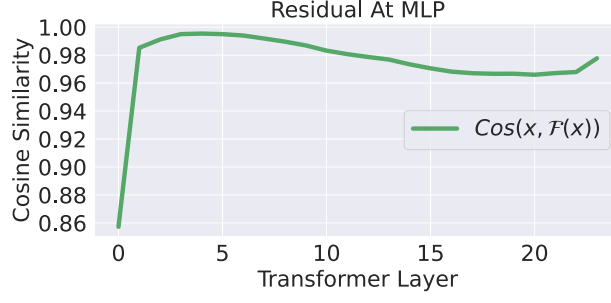

(a) Cosine Similarity

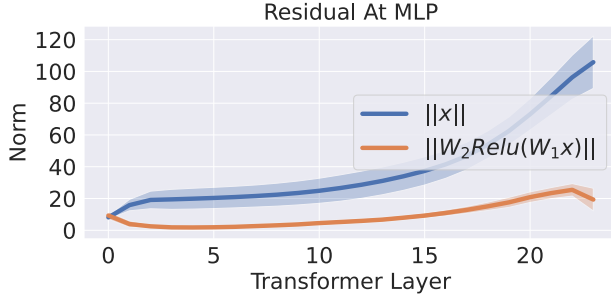

(b) Norm Comparison

Figure 10:  $x$  and  $\mathcal{F}(x)$  is high in cosine similarity

## 440 B Proofs

### 441 B.1 Proof of Theorem 3.1

442 We consider the token generation process of a simplified model: a single-layer transformer model  
443 with single-head attention.

$$x_{t+1} = \mathcal{F}(a_t), \text{ where } a_t = \text{softmax}(1/t \cdot x_t W_Q W_K^\top X_{t-1}^\top) X_{t-1} W_V W_O \quad (5)$$

444  $x_t \in \mathbb{R}^{1 \times d}$  is a row vector.  $X_{t-1} \in \mathbb{R}^{(t-1) \times d}$  denotes the aggregation of  $x_1, \dots, x_{t-1}$ , where  
445 the  $j$ th row is  $x_j$ .  $W_Q, W_K, W_V \in \mathbb{R}^{d \times p}$  and  $W_O \in \mathbb{R}^{p \times d}$  are the attention weights. Lastly,  
446  $\mathcal{F}: \mathbb{R}^{1 \times d} \rightarrow \mathbb{R}^{1 \times d}$  denotes the MLP block following attention block, a two-layer MLP with skip  
447 connections, given by

$$\mathcal{F}(x) = x + W_2 \text{relu}(W_1 x) \quad (6)$$

448 We are interested in the attention scores  $\alpha_t = \text{softmax}(1/t \cdot x_t W_Q W_K^\top X_{t-1}^\top)$ . Notice that  $\alpha_{t,j}$  scales  
449 with  $x_t W_Q W_K^\top x_j^\top$ . We first re-state the Theorem 3.1 below.

450 **Theorem B.1.** Let  $A = W_V W_O W_Q W_K^\top$  and let  $\lambda_K, \lambda_Q, \lambda_V, \lambda_O$  denote the largest singular values  
451 of  $W_K, W_Q, W_V, W_O$ , respectively. Consider the transformer in (5) with normalized inputs  $\|x_t\|_2 =$

452 1 for all  $t$ . Let  $c, \epsilon > 0$  be constants. Assume that  $a_t x_{t+1}^\top \geq (1 - \delta) \|a_t\|_2$  with  $\delta \leq \left(\frac{c\epsilon}{\lambda_Q \lambda_K \lambda_V \lambda_O}\right)^2$ .

453 Then for all  $x_\ell$  satisfying  $x_\ell A x_\ell^\top \geq c$  and  $x_\ell A x_\ell \geq \epsilon^{-1} \max_{j \in [t], j \neq \ell} x_j A x_\ell^\top$ , it holds that

$$\frac{x_\ell A x_\ell^\top}{\|a_t\|_2} (\alpha_{t,\ell} - 3\epsilon) \leq x_{t+1} W_Q W_K^\top x_j^\top \leq \frac{x_\ell A x_\ell^\top}{\|a_t\|_2} (\alpha_{t,\ell} + 3\epsilon) \quad (7)$$

454 As a preparation of the proof, we first show two lemmas.

455 **Lemma B.1.** Let  $x_1, x_2 \in \mathbb{R}^{1 \times m}$  satisfies  $\|x_1\|_2 = \|x_2\|_2 = 1$  and  $x_1 x_2^\top \geq 1 - \delta$  for some  
456  $\delta \in (0, 1)$ . Then for all  $y \in \mathbb{R}^{1 \times m}$  we have

$$|x_1 y^\top - x_2 y^\top| \leq \sqrt{2\delta} \|y\|_2$$

457 *Proof.* Let  $x_2 = x_2^{\parallel} + x_2^{\perp}$  where

$$x_2^{\parallel} = x_1 x_2^{\top} \cdot x_1; \quad x_2^{\perp} = x_2 - x_2^{\parallel}$$

458 Then it is easy to see that  $x_2^{\perp} x_1^{\top} = 0$ . By the Pythagorean Theorem, we have

$$\|x_2^{\perp}\|_2^2 = \|x_2\|_2^2 - \|x_2^{\parallel}\|_2^2 = \delta(2 - \delta)$$

459 Therefore, we have

$$\begin{aligned} \|x_1 - x_2\|_2^2 &= \|(x_1 - x_2^{\parallel}) - x_2^{\perp}\|_2^2 \\ &= \|(1 - x_1 x_2^{\top}) x_1 - x_2^{\perp}\|_2^2 \\ &= (1 - x_1 x_2^{\top})^2 + \|x_2^{\perp}\|_2^2 \\ &= 2\delta \end{aligned}$$

460 Thus, the Cauchy-Schwarz inequality implies

$$|x_1 y^{\top} - x_2 y^{\top}| \leq \|x_1 - x_2\|_2 \cdot \|y\|_2 = \sqrt{2\delta} \|y\|_2$$

461

□

462 **Lemma B.2.** Let  $\ell \in [t]$  be given. Suppose that  $x_{\ell} A x_{\ell}^{\top} > \epsilon^{-1} |x_j A x_{\ell}^{\top}|$  for all  $j \neq \ell$ . Then we have

$$(\mathcal{S}(t)_{\ell} - \epsilon) x_{\ell}^{\top} a x_{\ell} \leq x_{\ell}^{\top} W_K^{\top} W_Q a_t \leq (\mathcal{S}(t)_{\ell} + \epsilon) x_{\ell}^{\top} a x_{\ell}$$

463 *Proof.* Notice that

$$a_t = \alpha_t X_{t-1} W_V W_O = \left( \sum_{j=1}^{t-1} \alpha_{t,j} x_j \right) W_V W_O$$

464 Thus, we have

$$a_t W_Q W_K^{\top} x_{\ell}^{\top} = \left( \sum_{j=1}^{t-1} \alpha_{t,j} x_j \right) W_V W_O W_Q W_K^{\top} x_{\ell}^{\top} = \sum_{j=1}^{t-1} \alpha_{t,j} x_j A x_{\ell}^{\top}$$

465 Therefore

$$\begin{aligned} |a_t W_Q W_K^{\top} x_{\ell}^{\top} - \alpha_{t,\ell} x_{\ell} A x_{\ell}^{\top}| &= \left| \sum_{j=1, j \neq \ell}^{t-1} \alpha_{t,j} x_j A x_{\ell}^{\top} \right| \\ &\leq \sum_{j=1, j \neq \ell}^{t-1} \alpha_{t,j} |x_j A x_{\ell}^{\top}| \\ &\leq \epsilon x_{\ell} A x_{\ell}^{\top} \sum_{j=1, j \neq \ell}^{t-1} \alpha_{t,j} \\ &\leq \epsilon x_{\ell} A x_{\ell}^{\top} \end{aligned}$$

466 where in the second inequality we use  $\epsilon^{-1} |x_j A x_{\ell}^{\top}| \leq x_{\ell} A x_{\ell}^{\top}$  and in the third inequality we use

467  $\sum_{j=1, j \neq \ell}^{t-1} \alpha_{t,j} \leq \sum_{j=1}^{t-1} \alpha_{t,j} = 1$ . This implies that

$$(\alpha_{t,\ell} - \epsilon) x_{\ell} A x_{\ell}^{\top} \leq a_t W_Q W_K^{\top} x_{\ell}^{\top} \leq (\alpha_{t,\ell} + \epsilon) x_{\ell} A x_{\ell}^{\top}$$

468

□

469 Now we proceed to the main body of the proof. Assume that  $\|x_\ell\|_2 = 1$  for all  $\ell$ . Using Lemma  
 470 (B.1), if  $a_t x_{t+1}^\top \geq (1 - \delta) \|a_t\|_2$ , then we have

$$\left| \|a_t\|_2^{-1} a_t W_Q W_K^\top x_\ell^\top - x_{t+1} W_Q W_K^\top x_\ell^\top \right| \leq \sqrt{2\delta} \|W_Q W_K^\top x_\ell^\top\|_2$$

471 Recall that  $\lambda_Q, \lambda_K$  are the maximum singular values of  $W_Q$  and  $W_K$ , respectively. Then it holds  
 472 that  $\|W_Q W_K^\top x_\ell^\top\|_2 \leq \lambda_Q \lambda_K \|x_\ell\|_2$ . Using  $\|x_\ell\|_2 = 1$ , we have

$$\left| \|a_t\|_2^{-1} a_t W_Q W_K^\top x_\ell^\top - x_{t+1} W_Q W_K^\top x_\ell^\top \right| \leq \sqrt{2\delta} \lambda_Q \lambda_K$$

473 Notice that

$$\begin{aligned} \|a_t\|_2 &= \left\| \left( \sum_{j=1}^{t-1} \alpha_{t,j} x_j \right) W_V W_O \right\| \\ &\leq \lambda_O \lambda_V \left\| \sum_{j=1}^{t-1} \alpha_{t,j} x_j \right\|_2 \\ &\leq \lambda_O \lambda_V \sum_{j=1}^{t-1} \alpha_{t,j} \|x_j\|_2 \\ &= \lambda_O \lambda_V \end{aligned}$$

474 Then since  $\delta \leq \left( \frac{c\epsilon}{\lambda_Q \lambda_K \lambda_V \lambda_O} \right)^2$ , we have

$$\left| \|a_t\|_2^{-1} a_t W_Q W_K^\top x_\ell^\top - x_{t+1} W_Q W_K^\top x_\ell^\top \right| \leq \frac{2c\epsilon}{\lambda_V \lambda_O} \leq \frac{2c\epsilon}{\|a_t\|_2}$$

475 Since by Lemma (B.2), we have

$$\left| a_t W_Q W_K^\top x_\ell^\top - \alpha_{t,\ell} x_\ell A x_\ell^\top \right| \leq \epsilon x_\ell^\top a x_\ell$$

476 It must hold that

$$\left| x_{t+1} W_Q W_K^\top x_\ell^\top - \|a_{t+1}\|_2^{-1} \alpha_{t,\ell} x_\ell A x_\ell^\top \right| \leq \frac{\epsilon}{\|a_t\|_2} x_\ell^\top a x_\ell + \frac{2c\epsilon}{\|a_t\|_2}$$

477 Since  $x_\ell^\top a x_\ell \geq c$ , it holds that

$$\frac{2c\epsilon}{\|a_t\|_2} \leq \frac{2\epsilon}{\|a_t\|_2} x_\ell^\top a x_\ell$$

478 which implies that

$$\left| x_{t+1} W_Q W_K^\top x_\ell^\top - \|a_t\|_2^{-1} \alpha_{t,\ell} x_\ell A x_\ell^\top \right| \leq \frac{3\epsilon}{\|a_t\|_2} x_\ell^\top a x_\ell$$

479 Therefore

$$\frac{x_\ell A x_\ell^\top}{\|a_t\|_2} (\alpha_{t,\ell} - 3\epsilon) \leq x_{t+1} W_Q W_K^\top x_\ell^\top \leq \frac{x_\ell A x_\ell^\top}{\|a_t\|_2} (\alpha_{t,\ell} + 3\epsilon)$$

## 480 B.2 Proof of Theorem 4.1

481 Let  $\{\tilde{x}_t\}_{t=0}^T$  denote the tokens generated by the transformer with budget KV cache as in Algorithm 2  
 482 with  $m = 1$ :

$$\tilde{x}_{t+1} = \mathcal{F}(\tilde{a}_t), \text{ where } \tilde{a}_t = \text{softmax} \left( \frac{1}{t} \cdot \tilde{x}_t W_Q \tilde{\mathcal{K}}_t^\top \right) \tilde{\mathcal{V}}_t^\top W_O$$

483 Notice that when  $m = 1$ , i.e., in each iteration, we drop one token with the lowest score, the cache  
 484 will always maintain  $B$  tokens. If the ranking of the attention scores does not change in each iteration,  
 485 Algorithm 2 will always drop tokens with the smallest attention scores.

486 For reference purposes, let  $\{x_t\}_{t=0}^T$  denote the tokens generated by a vanilla transformer defined in  
 487 (5). We re-state Theorem 4.1 below, which bounds the difference  $\|x_t - \tilde{x}_t\|_2$ .

488 **Theorem B.2.** Let  $\lambda_1, \lambda_2$  denote the largest singular values of  $W_1$  and  $W_2$  in (6). Let

$$\beta_{t,j} = \frac{\exp(1/t \cdot \tilde{x}_t W_Q W_K^\top \tilde{x}_j^\top)}{\sum_{i=1}^{t-1} \exp(1/t \cdot \tilde{x}_t W_Q W_K^\top \tilde{x}_i^\top)}$$

489 and assume that each  $\beta_{t,j} = cv_{t,j}$ , where  $v_{t,j}$  are sampled from a power-law distribution with pdf  
 490  $f(x) = c(x+b)^{-k}$ . Suppose that  $\lambda_V \lambda_O (1 + \lambda_1 \lambda_2)(1 + \lambda_Q \lambda_K) \leq \frac{1}{2}$ . Let  $T_{\min}$  and  $T_{\max}$  denote  
 491 the starting and maximum sequence lengths, respectively, and let  $B \leq T_{\max}$  denote the budget as  
 492 in Algorithm 2. If for all  $t \in [T_{\min}, T_{\max}]$ ,  $S_t$  contains only tokens with at most the largest  $B$  values  
 493 of  $\beta_{t,j}$ , that is,  $|S_t| = B$  and  $\min_{j \in S_t} \beta_{t,j} \geq \max_{j \notin S_t} \beta_{t,j}$ , then for all  $\epsilon \in (0, 1)$ , with probability  
 494 at least  $1 - T_{\max} \exp\left(-\frac{\epsilon^2 b^2 (T_{\min} - 1)}{(k-2)^2 (u-b)^2}\right) - T_{\max} \exp\left(-\frac{2(T_{\min} - 1)(1-B/T_{\max})^2}{(1-\epsilon)^2}\right)$ , the following error  
 495 bound must hold for all  $t \in [T_{\min}, T_{\max}]$

$$\mathbb{E} [\|x_t - \tilde{x}_t\|_2] \leq \frac{2.1(1 - B/T_{\max})}{(1 - \epsilon)^2} \left( k - (k - 1) \left( \frac{1 - \epsilon}{B/T_{\max} - \epsilon} \right)^{1/(k-1)} \right)$$

496 Define  $m_{k,j} = \mathbb{I}\{j \in S_t\}$ . With the definition of  $m_{k,j}$ ,  $\tilde{a}_t$  can be written as

$$\tilde{a}_t = \left( \sum_{j=1}^{t-1} \tilde{\alpha}_{t,j} \tilde{x}_j \right) W_V W_O; \quad \tilde{\alpha}_{t,j} = \frac{m_{k,j} \exp(1/t \cdot \tilde{x}_t W_Q W_K^\top \tilde{x}_j^\top)}{\sum_{i=1}^{t-1} m_{k,i} \exp(1/t \cdot \tilde{x}_t W_Q W_K^\top \tilde{x}_i^\top)} \quad (8)$$

497 Our first lemma shows the Lipschitzness of the attention module.

498 **Lemma B.3.** Consider two sequences of tokens  $\{x_i\}_{i=1}^t$  and  $\{y_i\}_{i=1}^t$  where  $\|x_i\|_2 = \|y_i\|_2 = 1$  for  
 499 all  $i \in [t]$ . Define  $X_{t-1}, Y_{t-1} \in \mathbb{R}^{(t-1) \times d}$  as the matrices whose  $i$ th row are  $x_i$  and  $y_i$ , respectively.  
 500 Let  $\Delta_t = \|x_t - y_t\|_2$ . Then we have

$$\left\| \text{softmax} \left( \frac{1}{t} x_t W_Q W_K^\top X_{t-1}^\top \right)_2 - \text{softmax} \left( \frac{1}{t} y_t W_Q W_K^\top Y_{t-1}^\top \right)_2 \right\|_2 \leq 2 \frac{\sqrt{t-1}}{t} \lambda_Q \lambda_K \Delta_t$$

501 *Proof.* We can decompose the difference as

$$\begin{aligned} & \left\| \text{softmax} \left( \frac{1}{t} x_t W_Q W_K^\top X_{t-1}^\top \right) - \text{softmax} \left( \frac{1}{t} y_t W_Q W_K^\top Y_{t-1}^\top \right) \right\|_2 \\ & \leq \left\| \text{softmax} \left( \frac{1}{t} x_t W_Q W_K^\top X_{t-1}^\top \right) - \text{softmax} \left( \frac{1}{t} x_t W_Q W_K^\top Y_{t-1}^\top \right) \right\|_2 \\ & \quad + \left\| \text{softmax} \left( \frac{1}{t} x_t W_Q W_K^\top Y_{t-1}^\top \right) - \text{softmax} \left( \frac{1}{t} y_t W_Q W_K^\top Y_{t-1}^\top \right) \right\|_2 \end{aligned}$$

502 By the Lipschitzness of softmax, we have

$$\begin{aligned} & \left\| \text{softmax} \left( \frac{1}{t} x_t W_Q W_K^\top X_{t-1}^\top \right) - \text{softmax} \left( \frac{1}{t} x_t W_Q W_K^\top Y_{t-1}^\top \right) \right\|_2 \\ & \leq \frac{1}{t} \left\| x_t W_Q W_K^\top (X_{t-1} - Y_{t-1})^\top \right\|_2 \\ & \leq \frac{1}{t} \lambda_Q \lambda_K \|x_t\|_2 \|X_{t-1} - Y_{t-1}\|_2 \end{aligned}$$

503 Since  $\|x_t\|_2 = 1$  and  $\|X_{t-1} - Y_{t-1}\|_2 = \left( \sum_{j=1}^{t-1} \|x_j - y_j\|_2^2 \right)^{\frac{1}{2}} \leq \sqrt{t-1} \Delta_t$ , we have

$$\left\| \text{softmax} \left( \frac{1}{t} x_t W_Q W_K^\top X_{t-1}^\top \right) - \text{softmax} \left( \frac{1}{t} x_t W_Q W_K^\top Y_{t-1}^\top \right) \right\|_2 \leq \frac{\sqrt{t-1}}{t} \lambda_Q \lambda_K \Delta_t$$

504 Similarly,

$$\begin{aligned} & \left\| \text{softmax} \left( \frac{1}{t} x_t W_Q W_K^\top Y_{t-1}^\top \right) - \text{softmax} \left( \frac{1}{t} y_t W_Q W_K^\top Y_{t-1}^\top \right) \right\|_2 \\ & \leq \frac{1}{t} \left\| (x_t - y_t) W_Q W_K^\top Y_{t-1}^\top \right\|_2 \\ & \leq \frac{1}{t} \lambda_Q \lambda_K \|Y_{t-1}\|_F \|x_t - y_t\|_2 \end{aligned}$$

505 Since  $\|x_t - y_t\|_2 = \Delta_t$  and  $\|Y_{t-1}\|_2 = \sqrt{t-1}$ , we have

$$\left\| \text{softmax} \left( \frac{1}{t} x_t W_Q W_K^\top Y_{t-1}^\top \right) - \text{softmax} \left( \frac{1}{t} y_t W_Q W_K^\top Y_{t-1}^\top \right) \right\|_2 \leq \frac{\sqrt{t-1}}{t} \lambda_Q \lambda_K \Delta_t$$

506 Combining the two bounds gives

$$\left\| \text{softmax} \left( \frac{1}{\sqrt{t}} x_t W_Q W_K^\top X_{t-1}^\top \right) - \text{softmax} \left( \frac{1}{\sqrt{t}} y_t W_Q W_K^\top Y_{t-1}^\top \right) \right\|_2 \leq 2 \frac{\sqrt{t-1}}{t} \lambda_Q \lambda_K \Delta_t$$

507 □

508 Our second lemma shows the difference between the output of the sampled and vanilla transformer  
509 when the input is the same.

510 **Lemma B.4.** Let  $\tilde{a}_t$  be defined as in [\(8\)](#). Define  $b_t$  as

$$b_t = \left( \sum_{j=1}^{t-1} \beta_{t,j} \tilde{x}_j \right) W_V W_O; \quad \beta_{t,j} = \frac{\exp(1/t \cdot \tilde{x}_t W_Q W_K^\top \tilde{x}_j^\top)}{\sum_{i=1}^{t-1} \exp(1/t \cdot \tilde{x}_t W_Q W_K^\top \tilde{x}_i^\top)} \quad (9)$$

511 Assume that  $\|x_j\|_2 = 1$  for all  $j \in [t]$ . Then we have

$$\|\tilde{a}_t - b_t\|_2 \leq \lambda_V \lambda_O \sum_{j \notin \hat{S}_t} \beta_{t,j}$$

512 *Proof.* A direction computation yields

$$\tilde{a}_t - b_t = \left( \sum_{j=1}^{t-1} (\tilde{\alpha}_{t,j} - \beta_{t,j}) \tilde{x}_j \right) W_V W_O$$

513 Thus,  $\|\tilde{a}_t - b_t\|_2$  can be bounded as

$$\|\tilde{a}_t - b_t\|_2 \leq \lambda_V \lambda_O \sum_{j=1}^{t-1} (\tilde{\alpha}_{t,j} - \beta_{t,j}) \|\tilde{x}_j\|_2 = \lambda_V \lambda_O \sum_{j=1}^{t-1} (\tilde{\alpha}_{t,j} - \beta_{t,j})$$

514 since  $\|\tilde{x}_j\|_2 = 1$  for all  $j \in [t]$ . Now we analyze  $\tilde{\alpha}_{t,j} - \beta_{t,j}$ . Let  $\hat{S}_t = S_t \setminus \{t\}$ . Then  $m_{k,j} = 1$  if  
515 and only if  $j \in \hat{S}_t$ . For convenience, let  $r_{t,j} = 1/t \cdot \tilde{x}_t W_Q W_K^\top \tilde{x}_j^\top$ . Thus,  $\beta$  can be written as

$$\beta_{t,j} = \frac{\exp(r_{t,j})}{\sum_{i \in \hat{S}_t} \exp(r_{t,i}) + \sum_{i \notin \hat{S}_t} \exp(r_{t,i})}$$

516 Furthermore, for all  $j \notin \hat{S}_t$ , we have  $\tilde{\alpha}_{t,j} = 0$ . For all  $j \in \hat{S}_t$ , we have

$$\tilde{\alpha}_{t,j} = \frac{\exp(r_{t,j})}{\sum_{i \in \hat{S}_t} \exp(r_{t,i})}$$

517 Therefore, for all  $j \in \hat{S}_t$ , we have

$$\begin{aligned} \beta_{t,j} - \tilde{\alpha}_{t,j} &= \exp(r_{t,j}) \cdot \frac{\sum_{i \notin \hat{S}_t} \exp(r_{t,i})}{\left( \sum_{i \in \hat{S}_t} \exp(r_{t,i}) \right) \left( \sum_{i \in \hat{S}_t} \exp(r_{t,i}) + \sum_{i \notin \hat{S}_t} \exp(r_{t,i}) \right)} \\ &= \frac{\exp(r_{t,j})}{\sum_{i \in \hat{S}_t} \exp(r_{t,i})} \cdot \frac{\sum_{i \notin \hat{S}_t} \exp(r_{t,i})}{\sum_{i \in \hat{S}_t} \exp(r_{t,i}) + \sum_{i \notin \hat{S}_t} \exp(r_{t,i})} \\ &= \tilde{\alpha}_{t,j} \sum_{i \notin \hat{S}_t} \beta_{t,j} \end{aligned}$$

518 Therefore, the bound of  $\|\tilde{a}_t - b_t\|_2$  can be written as

$$\|\tilde{a}_t - b_t\|_2 \leq \lambda_V \lambda_O \left( \sum_{j \in \hat{S}_t} \tilde{\alpha}_{t,j} \sum_{i \notin \hat{S}_t} \beta_{t,j} - \sum_{j \notin \hat{S}_t} \beta_{t,j} \right) = 2\lambda_V \lambda_O \sum_{j \notin \hat{S}_t} \beta_{t,j}$$

519 where the last equality follows from  $\sum_{j \in \hat{S}_t} \tilde{\alpha}_{t,j} = 1$ . □

520 Our last lemma shows the Lipschitzness of the MLP in (6).

521 **Lemma B.5.** Let  $\lambda_1, \lambda_2$  denote the largest singular values of  $W_1, W_2$  in (6). For all  $x_1, x_2 \in \mathbb{R}^d$ ,  
 522 we have

$$\|\mathcal{F}(x_1) - \mathcal{F}(x_2)\| \leq (1 + \lambda_1 \lambda_2) \|x_1 - x_2\|_2$$

523 *Proof.* Direct computation yields

$$\begin{aligned} \|\mathcal{F}(x_1) - \mathcal{F}(x_2)\| &= \|(x_1 + W_2 \text{relu}(W_1 x_1)) - (x_2 + W_2 \text{relu}(W_1 x_2))\| \\ &\leq \|x_1 - x_2\|_2 + \|W_2 \text{relu}(W_1 x_1) - W_2 \text{relu}(W_1 x_2)\| \\ &\leq \|x_1 - x_2\|_2 + \lambda_2 \|\text{relu}(W_1 x_1) - \text{relu}(W_1 x_2)\| \\ &\leq \|x_1 - x_2\|_2 + \lambda_2 \|W_1(x_1 - x_2)\|_2 \\ &\leq \|x_1 - x_2\|_2 + \lambda_1 \lambda_2 \|x_1 - x_2\|_2 \\ &= (1 + \lambda_1 \lambda_2) \|x_1 - x_2\|_2 \end{aligned}$$

524 where in the third inequality we use the fact that  $\text{relu}(\cdot)$  is 1-Lipschitz. □

525 Now we turn to the proof of our main theorem. Combining all of the results, we have

$$\begin{aligned} a_t - \tilde{a}_t &= \left( \sum_{j=1}^{t-1} \alpha_{t,j} x_j \right) W_V W_O - \left( \sum_{j=1}^{t-1} \tilde{\alpha}_{t,j} \tilde{x}_j \right) W_V W_O \\ &= \underbrace{\left( \sum_{j=1}^{t-1} \alpha_{t,j} x_j \right) W_V W_O - \left( \sum_{j=1}^{t-1} \alpha_{t,j} \tilde{x}_j \right) W_V W_O}_{\mathcal{T}_1} \\ &\quad + \underbrace{\left( \sum_{j=1}^{t-1} \alpha_{t,j} \tilde{x}_j \right) W_V W_O - \left( \sum_{j=1}^{t-1} \beta_{t,j} \tilde{x}_j \right) W_V W_O}_{\mathcal{T}_2} \\ &\quad + \underbrace{\left( \sum_{j=1}^{t-1} \beta_{t,j} \tilde{x}_j \right) W_V W_O - \left( \sum_{j=1}^{t-1} \tilde{\alpha}_{t,j} \tilde{x}_j \right) W_V W_O}_{\mathcal{T}_3} \end{aligned}$$

526 Therefore, by triangle inequality, we have

$$\|a_t - \tilde{a}_t\|_2 \leq \|\mathcal{T}_1\|_2 + \|\mathcal{T}_2\|_2 + \|\mathcal{T}_3\|_2 \tag{10}$$

527 To start, the magnitude of  $\mathcal{T}_1$  can be bounded as

$$\begin{aligned} \|\mathcal{T}_1\|_2 &= \left\| \left( \sum_{j=1}^{t-1} \alpha_{t,j} (x_{t,j} - \tilde{x}_{t,j}) \right) W_V W_O \right\|_2 \\ &\leq \lambda_V \lambda_O \left\| \sum_{j=1}^{t-1} \alpha_{t,j} (x_{t,j} - \tilde{x}_{t,j}) \right\| \\ &\leq \lambda_V \lambda_O \sum_{j=1}^{t-1} \alpha_{t,j} \|x_{t,j} - \tilde{x}_{t,j}\|_2 \\ &\leq \lambda_V \lambda_O \Delta_t \sum_{j=1}^{t-1} \alpha_{t,j} \\ &= \lambda_V \lambda_O \Delta_t \end{aligned}$$



528 where in the third inequality we use  $\|x_{t,j} - \tilde{x}_{t,j}\|_2 = \Delta_t$  and in the last equality we use  
 529  $\sum_{j=1}^{t-1} \alpha_{t,j} = 1$ . To bound the magnitude of  $\mathcal{T}_2$ , we apply Lemma [B.3](#), which shows that  
 530  $\|\alpha_t - \beta_t\| \leq 2 \frac{\sqrt{t-1}}{t} \lambda_Q \lambda_K \Delta_t$  to get that

$$\begin{aligned} \|\mathcal{T}_2\|_2 &= \left\| \left( \sum_{j=0}^{t-1} (\alpha_{t,j} - \beta_{t,j}) \tilde{x}_j \right) W_V W_O \right\|_2 \\ &\leq \lambda_V \lambda_O \left\| \left( \sum_{j=0}^{t-1} (\alpha_{t,j} - \beta_{t,j}) \tilde{x}_j \right) \right\|_2 \\ &\leq \lambda_V \lambda_O \sum_{j=0}^{t-1} |\alpha_{t,j} - \beta_{t,j}| \|\tilde{x}_j\|_2 \\ &\leq \lambda_V \lambda_O \|\alpha_t - \beta_t\|_1 \\ &\leq \sqrt{t-1} \lambda_V \lambda_O \|\alpha_t - \beta_t\|_2 \\ &\leq 2 \left( 1 - \frac{1}{t} \right) \lambda_Q \lambda_K \lambda_V \lambda_O \Delta_t \end{aligned}$$

531 Lastly, to bound the magnitude of  $\mathcal{T}_3$ , we use Lemma [B.4](#) to get that

$$\|\mathcal{T}_3\|_2 \leq 2 \lambda_V \lambda_O \sum_{j \notin \hat{S}_t} \beta_{t,j}$$

532 Putting things together for [\(10\)](#), we have

$$\|a_t - \tilde{a}_t\|_2 \leq \lambda_V \lambda_O \left( 2 \sum_{j \notin \hat{S}_t} \beta_{t,j} + (2 \lambda_Q \lambda_K + 1) \Delta_t \right)$$

533 By Lemma [B.5](#) we can further show that

$$\|x_{t+1} - \tilde{x}_{t+1}\|_2 \leq (1 + \lambda_1 \lambda_2) \lambda_V \lambda_O \left( 2 \sum_{j \notin \hat{S}_t} \beta_{t,j} + (2 \lambda_Q \lambda_K + 1) \Delta_t \right)$$

534 By Theorem [B.3](#), we have that with probability at least  $1 - T_{\max} \exp\left(-\frac{\epsilon^2 b^2 (T_{\min}-1)}{(k-2)^2 (u-b)^2}\right) -$   
 535  $T_{\max} \exp\left(-\frac{2(T_{\min}-1)(1-B/T_{\max})^2}{(1-\epsilon)^2}\right)$ , it holds for all  $t \in [T_{\min}, T_{\max}]$  that

$$\mathbb{E} \left[ \sum_{j \notin \hat{S}_t} \beta_{t,j} \right] \leq \frac{(1 - B/T_{\max})}{0.98(1 - \epsilon)^2} \left( k - (k-1) \left( \frac{1 - \epsilon}{B/T_{\max} - \epsilon} \right)^{\frac{1}{k-1}} \right) := \Delta_{\max}$$

536 Given that  $\mathbb{E}[\|x_t - \tilde{x}_t\|] \leq 2 \Delta_{\max}$ , we have

$$\begin{aligned} \mathbb{E}[\|x_{t+1} - \tilde{x}_{t+1}\|_2] &\leq (1 + \lambda_1 \lambda_2) \lambda_V \lambda_O (2 \Delta_{\max} + 2 (2 \lambda_Q \lambda_K + 1) \Delta_{\max}) \\ &\leq 4 \lambda_V \lambda_O (1 + \lambda_1 \lambda_2) (1 + \lambda_Q \lambda_K) \Delta_{\max} \end{aligned}$$

537 Thus, as long as  $\lambda_V \lambda_O (1 + \lambda_1 \lambda_2) (1 + \lambda_Q \lambda_K) \leq \frac{1}{2}$ , we can guarantee that

$$\mathbb{E}[\|x_{t+1} - \tilde{x}_{t+1}\|_2] \leq 2 \Delta_{\max}$$

538 Thus, for all  $t \in [T_{\min}, T_{\max}]$ , we have that

$$\mathbb{E}[\|x_t - \tilde{x}_t\|_2] \leq \frac{2.1(1 - B/T_{\max})}{(1 - \epsilon)^2} \left( k - (k-1) \left( \frac{1 - \epsilon}{B/T_{\max} - \epsilon} \right)^{\frac{1}{k-1}} \right)$$

539 **B.3 Budgeted Cache**

540 **Theorem B.3.** Let  $\beta_{t,j}$  be sampled from some power-law distribution  $f(x) = c(x+b)^{-\gamma}$  with support  
 541 on  $[0, u-b]$  for some  $k > 2$  and  $u \geq 5b$ . Let  $S_t$  be defined in Theorem B.2 and define  $\hat{S}_t = S_t \setminus \{t\}$ .  
 542 Then with probability at least  $1 - T_{\max} \exp\left(-\frac{\epsilon^2 b^2 (T_{\min}-1)}{(k-2)^2 (u-b)^2}\right) - T_{\max} \exp\left(-\frac{2(T_{\min}-1)(1-B)^2}{(1-\epsilon)^2}\right)$  it  
 543 holds for all  $t \in T$  that

$$\mathbb{E} \left[ \sum_{j \notin \hat{S}_t} \beta_{t,j} \right] \leq \frac{(1 - B/T_{\max})}{0.98(1-\epsilon)^2} \left( k - (k-1) \left( \frac{1-\epsilon}{B/T_{\max} - \epsilon} \right)^{\frac{1}{k-1}} \right) \quad (11)$$

544 We consider the case of maintaining a budget of  $B$  by dropping the smallest  $\beta_{t,j}$ 's. Assume that  $v_j$   
 545 has pdf  $f(x) = c(x+b)^{-k}$  with support on  $[0, u-b]$ . To make things precise, we first compute  $c$

$$c = \left( \int_0^{u-b} (x+b)^{-k} dx \right)^{-1} = \frac{k-1}{b^{1-k} - u^{1-k}}$$

546 To start, we notice that

$$\int x(x+b)^{-k} = -\frac{(x+b)^{1-k}((k-1)x+b)}{(k-1)(k-2)} := g(x)$$

547 Let  $C = \sum_{j=1}^{t-1} v_j$ , then the expectation of  $C$  is

$$\begin{aligned} \mathbb{E}[C] &= (t-1)\mathbb{E}[v_1] = (t-1) \frac{k-1}{b^{1-k} - u^{1-k}} \int_0^\infty x(x+b)^{-k} dx \\ &= (t-1) \frac{k-1}{b^{1-k} - u^{1-k}} (g(u) - g(0)) \\ &= (t-1) \frac{k-1}{b^{1-k} - u^{1-k}} \left( \frac{b^{2-k}}{(k-1)(k-2)} - \frac{u^{1-k}((k-1)u - (k-2)b)}{(k-1)(k-2)} \right) \\ &= \frac{t-1}{k-2} \cdot \frac{b^{2-k} - (k-1)u^{2-k} + (k-2)bu^{1-k}}{b^{1-k} - u^{1-k}} \end{aligned}$$

548 Let  $\Delta = \frac{b^{2-k} - (k-1)u^{2-k} + (k-2)bu^{1-k}}{b^{1-k} - u^{1-k}}$ . By Hoeffding's inequality, we have that

$$\mathbb{P}(C \leq (1-\epsilon)\mathbb{E}[C]) \leq \exp\left(-\frac{2\epsilon^2 \mathbb{E}[C]^2}{(t-1)(u-b)^2}\right)$$

549 This implies that with probability at least  $1 - \exp\left(-\frac{2\epsilon^2 \Delta^2 (t-1)}{(k-2)^2 (u-b)^2}\right)$  we have

$$C \geq (1-\epsilon)\Delta \frac{t-1}{k-2}$$

550 Now, we proceed to bound  $\sum_{j \notin \hat{S}_t} \beta_{t,j}$  where  $\hat{S}_t = \{j \in [t-1] : \beta_{t,j} \geq \frac{\gamma}{C}\}$ . Equivalently, we can  
 551 bound  $C^{-1} \sum_{j=1}^{t-1} \mathbb{I}\{v_j \leq \gamma\} v_j$ . Its expectation is given by

$$\begin{aligned} \mathbb{E} \left[ C^{-1} \sum_{j=1}^{t-1} \mathbb{I}\{v_j \leq \gamma\} v_j \right] &\leq \frac{k-2}{(t-1)\Delta(1-\epsilon)} \mathbb{E} \left[ \sum_{j=1}^{t-1} \mathbb{I}\{v_j \leq \gamma\} v_j \right] \\ &= \frac{k-2}{\Delta(1-\epsilon)} \cdot \frac{k-1}{b^{1-k} - u^{1-k}} \int_0^\gamma x(x+b)^{-k} dx \\ &= \frac{(k-1)(k-2)}{\Delta(1-\epsilon)(b^{1-k} - u^{1-k})} (g(\gamma) - g(0)) \end{aligned}$$

552 We pause here and study how small can we choose  $\gamma$ . Notice that

$$\mathbb{E} \left[ \sum_{j=1}^{t-1} \mathbb{I}\{v_j \leq \gamma\} \right] = (t-1)\mathbb{P}(v_j \leq \gamma) = (t-1) \cdot \frac{b^{1-k} - (\gamma+b)^{1-k}}{b^{1-k} - u^{1-k}}$$

553 By Hoeffding's inequality again, we have that

$$\begin{aligned} & \mathbb{P} \left( \sum_{j=1}^{t-1} \mathbb{I}\{v_j \leq \gamma\} \geq (1-\epsilon)(t-1) \cdot \frac{b^{1-k} - (\gamma+b)^{1-k}}{b^{1-k} - u^{1-k}} \right) \\ & \leq \exp \left( - \frac{2(t-1)\epsilon^2 (b^{1-k} - (\gamma+b)^{1-k})^2}{(b^{1-k} - u^{1-k})^2} \right) \end{aligned}$$

554 Enforcing  $\sum_{j=1}^{t-1} \mathbb{I}\{v_j \leq \gamma\} \geq T_{\max} - B$  gives  $(\gamma+b)^{1-k} \leq b^{1-k} - \frac{1-B/T_{\max}}{1-\epsilon} (b^{1-k} - u^{1-k})$ ,

555 which can be satisfied as long as  $\gamma \geq \left( \left( \frac{B/T_{\max} - \epsilon}{1-\epsilon} \right)^{\frac{1}{1-k}} - 1 \right) b$ . Therefore

$$g(\gamma) = - \left( b^{1-k} - \frac{1-B/T_{\max}}{1-\epsilon} (b^{1-k} - u^{1-k}) \right) \frac{b + (k-1)\gamma}{(k-1)(k-2)}$$

556 We further notice that

$$b^{1-k} - \frac{1-B/T_{\max}}{1-\epsilon} (b^{1-k} - u^{1-k}) \geq \frac{B/T_{\max} - \epsilon}{1-\epsilon} (b^{1-k} - u^{1-k})$$

557 This gives

$$\begin{aligned} \mathbb{E} \left[ C^{-1} \sum_{j=1}^{t-1} \mathbb{I}\{v_j \leq \gamma\} v_j \right] & \leq \frac{b(1-B/T_{\max})}{\Delta(1-\epsilon)^2} - \frac{(k-1)(B/T_{\max} - \epsilon)\gamma}{\Delta(1-\epsilon)^2} \\ & \leq \frac{b(1-B/T_{\max})}{\Delta(1-\epsilon)^2} \left( k - (k-1) \left( \frac{1-\epsilon}{B/T_{\max} - \epsilon} \right)^{\frac{1}{k-1}} \right) \end{aligned}$$

558 Notice that if  $u \geq 5b$ , we have

$$\Delta = b - (k-1) \left( \frac{u}{b} \right)^{1-k} \cdot \frac{b-u}{b^{1-k} - u^{1-k}} \leq 0.98b$$

559 Therefore

$$\mathbb{E} \left[ C^{-1} \sum_{j=1}^{t-1} \mathbb{I}\{v_j \leq \gamma\} v_j \right] \leq \frac{(1-B/T_{\max})}{0.98(1-\epsilon)^2} \left( k - (k-1) \left( \frac{1-\epsilon}{B/T_{\max} - \epsilon} \right)^{\frac{1}{k-1}} \right)$$

560 holds with probability at least  $1 - \exp \left( - \frac{\epsilon^2 b^2 (t-1)}{(k-2)^2 (u-b)^2} \right) - \exp \left( - \frac{2(t-1)(1-B/T_{\max})^2}{(1-\epsilon)^2} \right)$ . Taking a

561 union bound gives the desired result.
